# Supplementary material for: Fabricating nanopores with diameters of sub-1 nm to 3 nm using multilevel pulse-voltage injection
Source: Sci Rep. 2014 May 21;4:5000. doi: 10.1038/srep05000 (PMC4028839; doi:10.1038/srep05000)

**Supplementary Information for**  
**Fabricating Nanopores with Diameters of Sub-1 nm to 3 nm**  
**Using Multilevel Pulse-voltage Injection**

Itaru Yanagi\*, Rena Akahori, Toshiyuki Hatano, and Ken-ichi Takeda

Hitachi Ltd., Central Research Laboratory, 1-280 Higashi-Koigakubo, Kokubunji, Tokyo, 185-8603

The Supplementary Information includes:

SI-1. Detailed procedure and flowchart of MPVI

SI-2. Magnified TEM images of nanopores fabricated by MPVI

SI-3. Time trace of ionic current through a nanopore with  $\phi_M = 0.88$  nm

SI-4. Dependence of ssDNA-translocation-event frequency on applied voltage

SI-5. Dependence of ionic-current-blockade histogram on applied voltage

## SI-1. Detailed procedure and flowchart of MPVI

The MPVI procedure is controlled by a programme written in Excel VBA (Visual Basic for Applications). The detailed flowchart of the programme is described below.

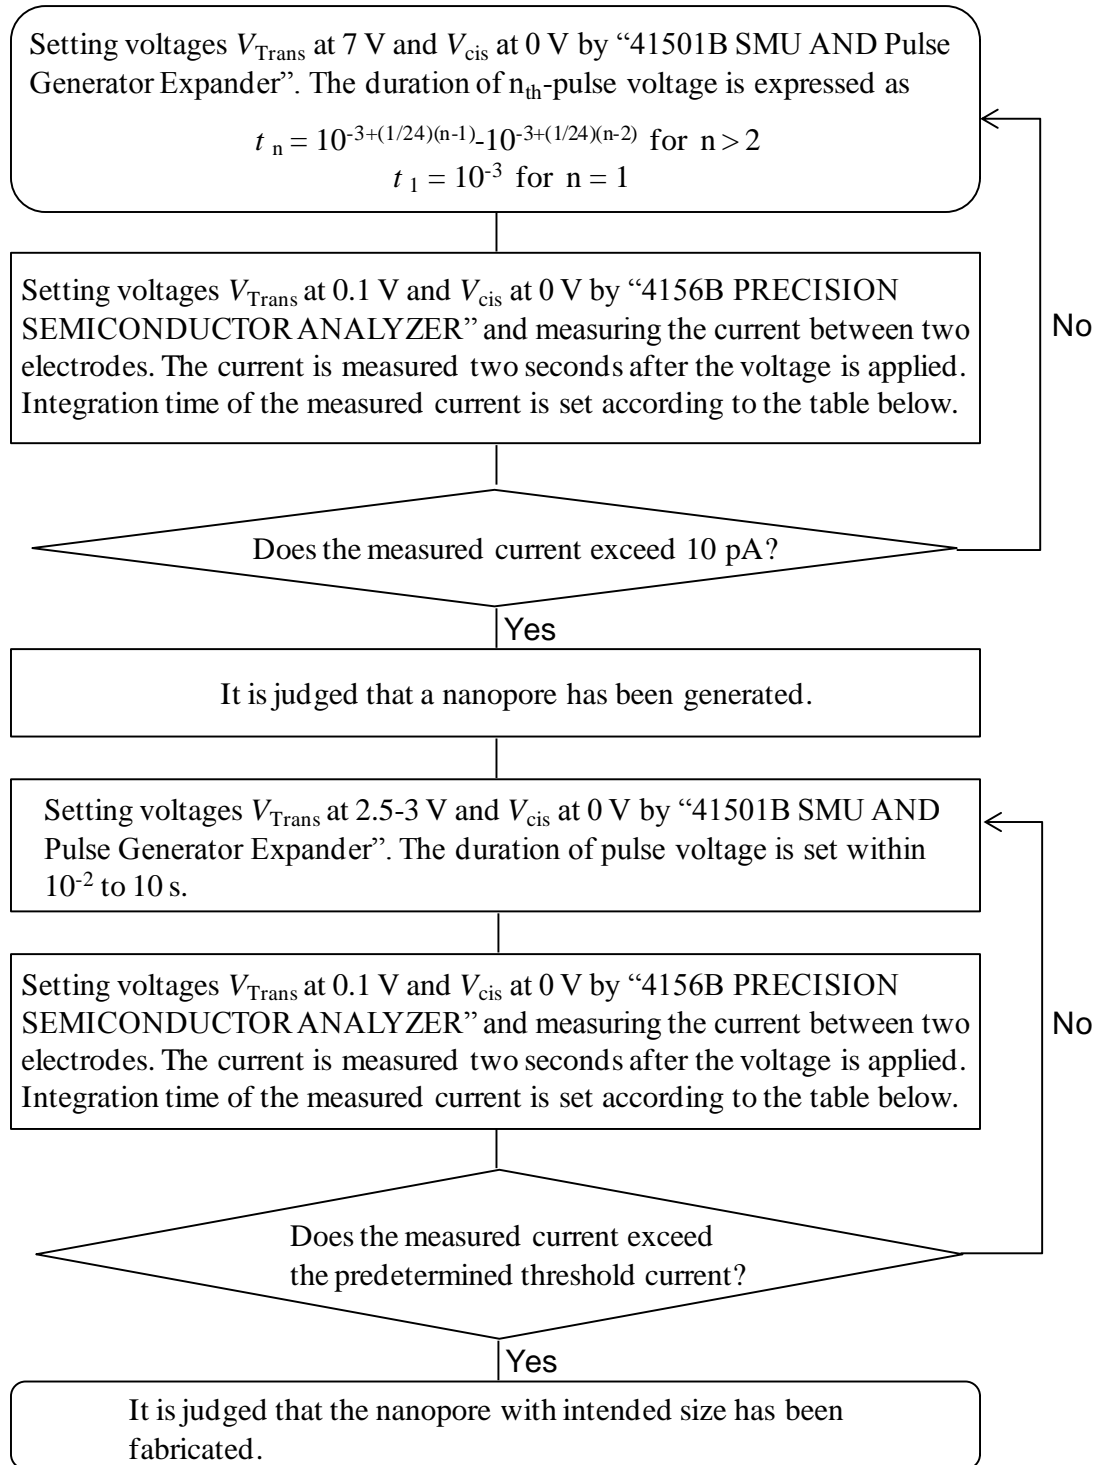

The integration time of the currents measured by a 4156B PRECISION SEMICONDUCTOR ANALYZER is listed in the table below. We allowed the integration time to be automatically changed according to the following table by setting it to “medium”.

| measurement range | integration time |
|-------------------|------------------|
| 10 pA             | 1 s              |
| 100 pA            | 200 ms           |
| 1 nA              | 100 ms           |

## SI-2. Magnified TEM images of nanopores fabricated by MPVI

Magnified views of the nanopores. Each left image shows the raw image of each right image. The ionic currents through the nanopore ( $I_{\text{Tot.}}$  at  $V_R = 0.1$  V) were (a) 1.30 nA, (b) 1.05 nA, (c) 0.81 nA, (d) 0.46 nA, (e) 0.47 nA, and (f) 0.08 nA. The nanopore with  $I_{\text{Tot.}} = 0.08$  nA at  $V_R = 0.1$  V was too small to measure.

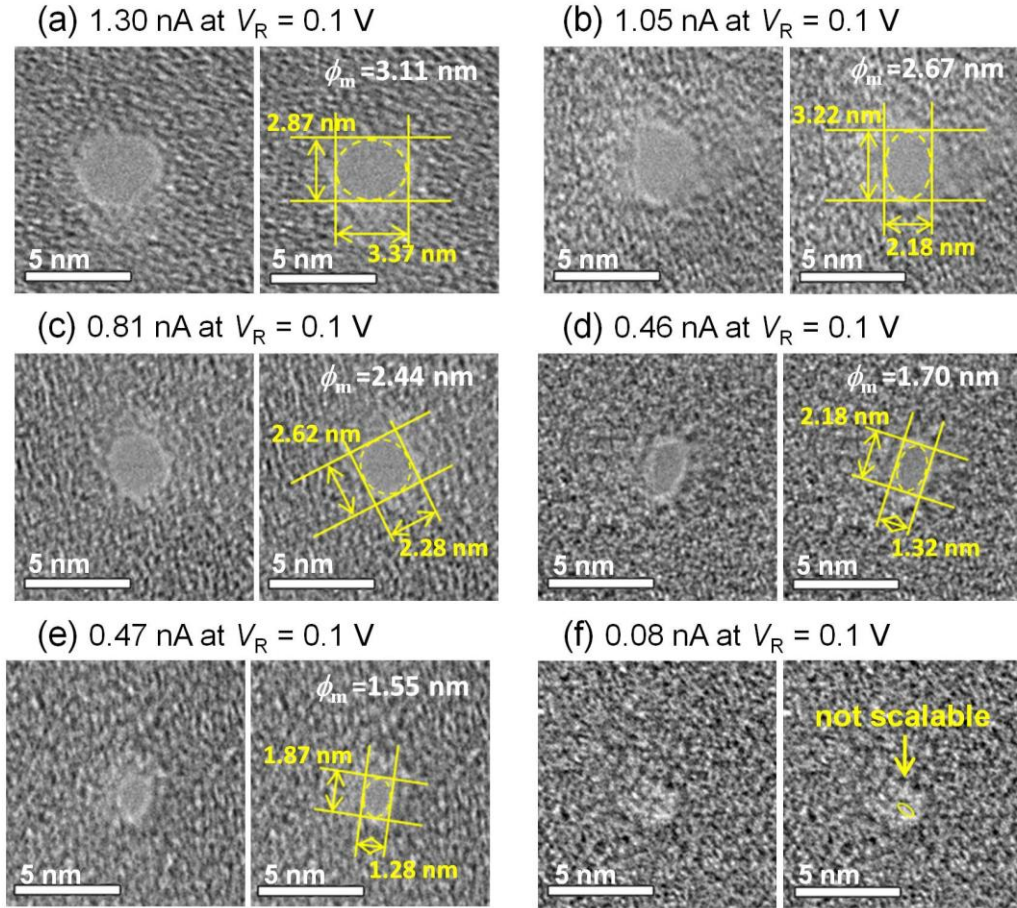

### SI-3. Time trace of ionic current through a nanopore with $\phi_M = 0.88$ nm

The ionic current was measured at 0.1 V, and the measurement data were low-pass filtered at 5 kHz. The nanopore was closed a few seconds after the start of the measurement, indicating that the nanopore was clogged with ssDNA. Although hyperpolarizing voltages ( $\pm 1.3$ -V<sub>DC</sub> pulse with a duration of 100 ms) were applied to remove ssDNA from the nanopore, the ionic current did not recover.

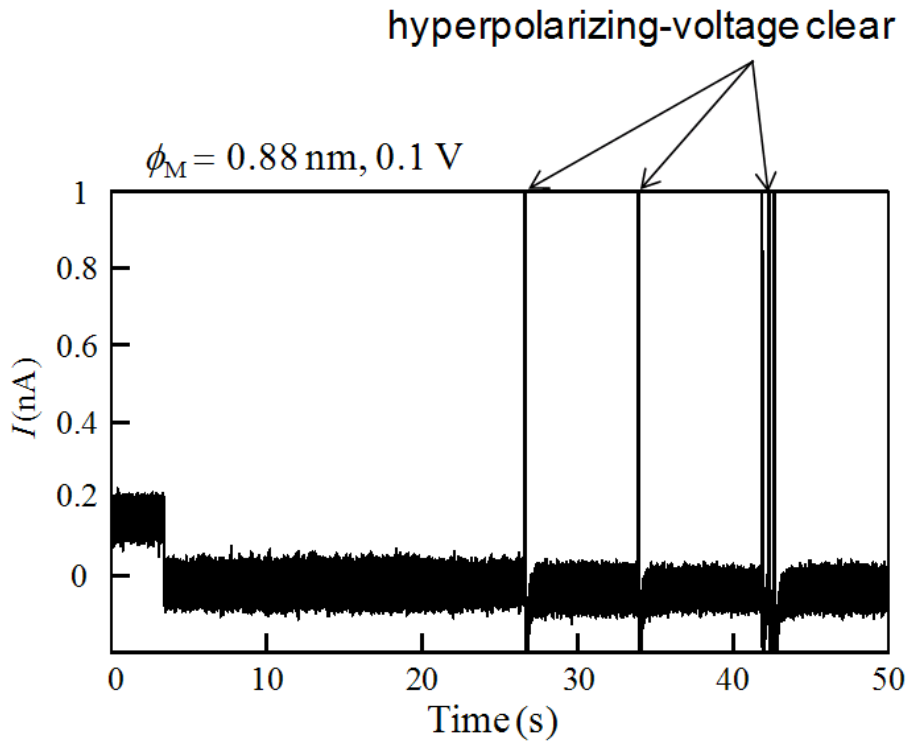

### SI-4. Dependence of frequency of ssDNA translocation events on applied voltage

The ionic current was measured at (a) 0.3 V and (b) 0.1 V using the same nanopore with  $\phi_M = 1.20$  nm. Each data set was low-pass filtered at 5 kHz. The event frequency significantly decreased as the voltage was decreased from 0.3 to 0.1 V; the statistical analysis of  $\Delta I$  was difficult at 0.1 V.

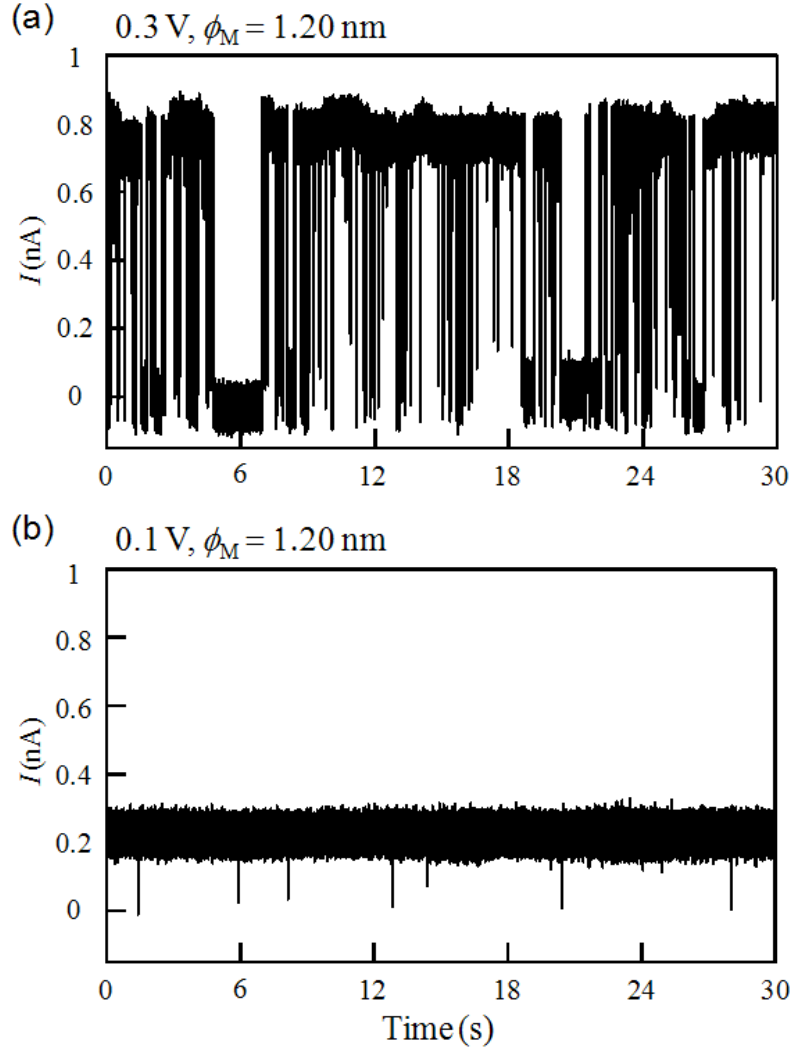

#### SI-5. Dependence of ionic-current-blockade histogram on applied voltage

The ionic currents were measured using the nanopores with  $\phi_M = 2.33$  nm (a-1 and a-2) and 2.55 nm (b-1 and b-2) at voltages of 0.3 V (a-1 and b-1) and 0.1 V (a-2 and b-2). Each data set was low-pass filtered at 10 kHz.  $\Delta I_p$  was determined by the peak value of the Gaussian fit. In Figs. a-1 and a-2, a more discriminative peak in the histogram appears at 0.1 V. The ratio of  $\Delta I_p$  at 0.3 V to  $\Delta I_p$  at 0.1 V is approximately three. This result indicates that  $\Delta I_p$  is proportional to the applied voltage. In Figs. b-1

and b-2, a discriminative peak in the histogram only appears at 0.1 V; it does not appear at 0.3 V. These results indicate that the translocation events cannot be measured accurately at 0.3 V when  $\phi_M > 2.5$  nm because the translocation speed of ssDNA through the nanopore increases with increasing  $\phi_M$ .

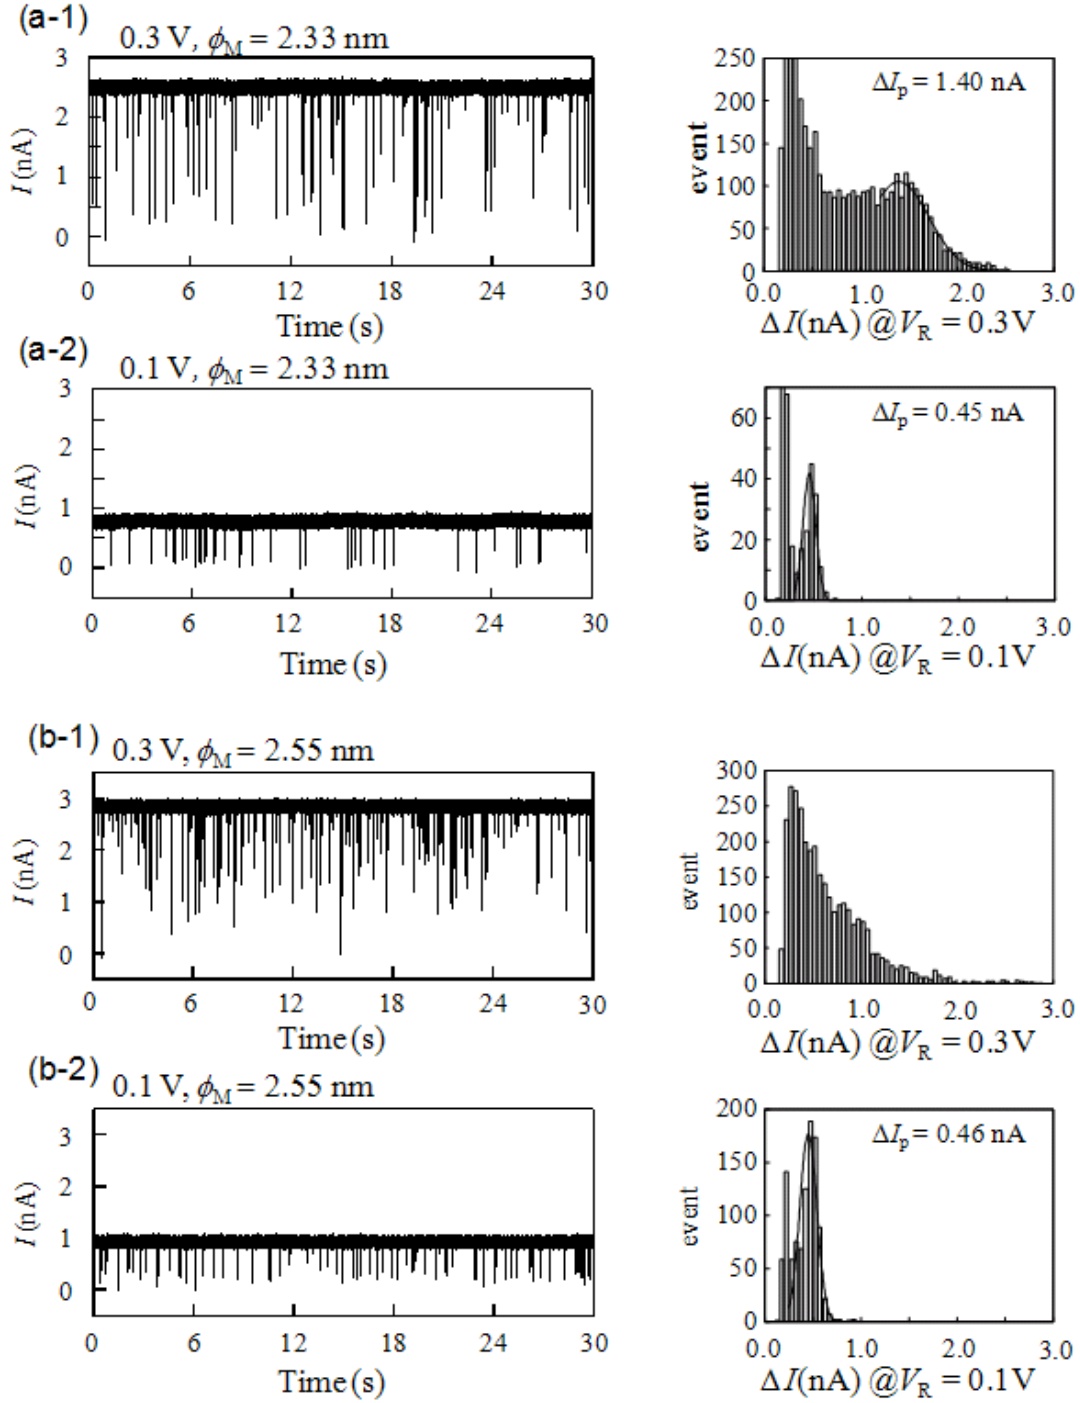

Supplement: Supplementary Information — for Fabricating Nanopores with Diameters of Sub-1 nm to 3 nm Using Multilevel Pulse-voltage Injection [file srep05000-s1.pdf]
